# Supplementary material for: Synthesis of activated carbons and nanoparticle-loaded activated carbons derived from bio-wastes for the removal of ibuprofen drug from water
Source: Royal Society of Chemistry journal article supplement (doi:10.1039/d6na00167j), 2026-05-15
Supplement: d6na00167j1.pdf [file d6na00167j1.pdf]

## Supporting information

### **Synthesis of activated carbons and nanoparticles loaded on activated carbons from bio-wastes for removal of ibuprofen drug in water**

Ngoc Dung Lai,<sup>1,2</sup> Thuan Van Tran<sup>1,2,\*</sup>

<sup>1</sup> Center for Hi-Tech Development, Nguyen Tat Thanh University, Saigon Hi-Tech Park, Ho Chi Minh City, Vietnam.

<sup>2</sup> Institute of Applied Technology and Sustainable Development, Nguyen Tat Thanh University, Ho Chi Minh City, Vietnam.

#### **Correspondence**

\* To whom correspondence should be addressed: Thuan Van Tran (Email: [tranvt@ntt.edu.vn](mailto:tranvt@ntt.edu.vn)),  
Nguyen Tat Thanh University, 298-300A Nguyen Tat Thanh, District 4, Ho Chi Minh City  
755414, Vietnam.

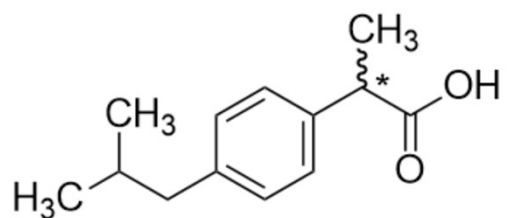

(*R,S*)-ibuprofen

\* Asymmetric (chiral) carbon

Fig. S1. Chemical structure of ibuprofen. Created with ChemDraw.

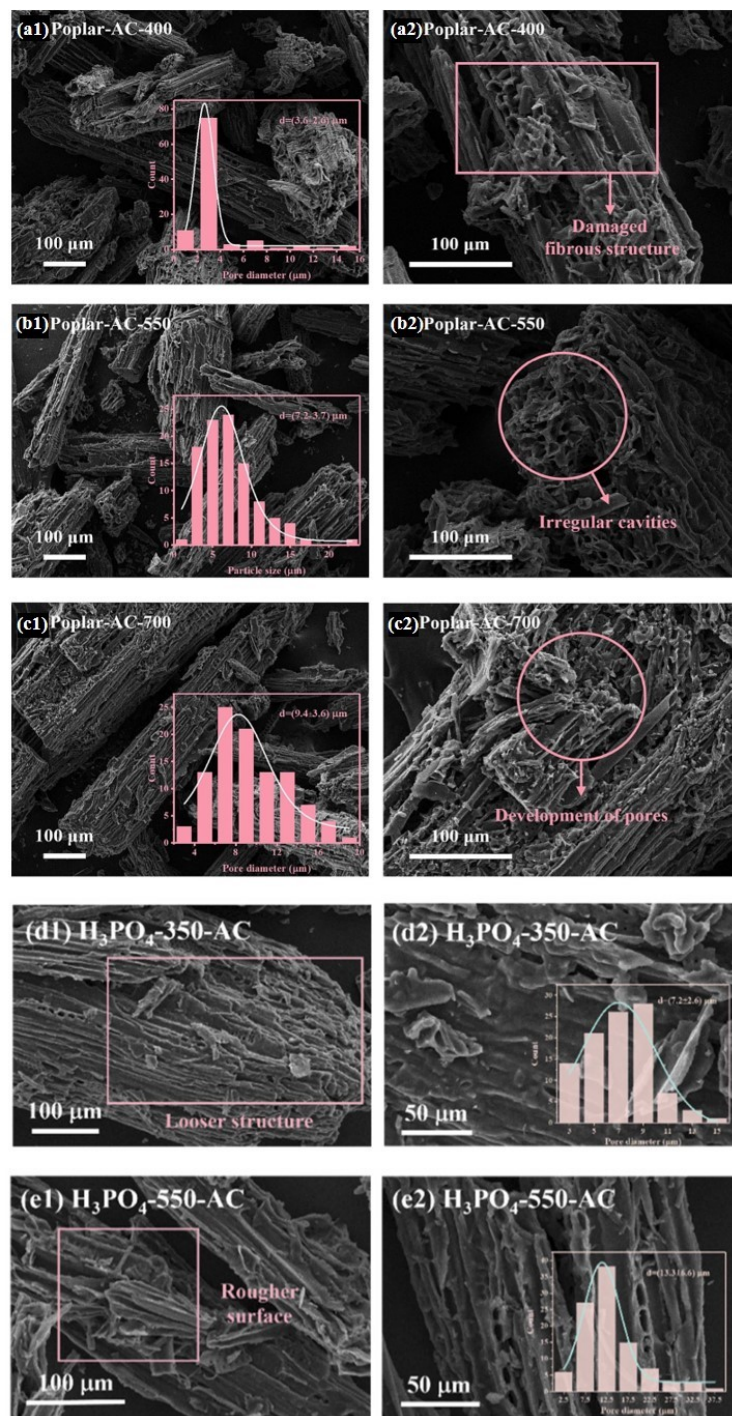

**Fig. S2.** (a-c) The SEM images of Poplar-derived activated carbon at 400, 550, and 700 °C (activated by  $\text{H}_3\text{PO}_4$ ). (d-e) The SEM images of willow wood-derived activated carbon at 350 and 550 °C (activated by  $\text{H}_3\text{PO}_4$ ). Reprinted from references (1) and (2) with permission from Elsevier.



Table S1. Some physicochemical properties of ibuprofen. Source: Drugbank, ID: DB01050.

| Property             | Value/Description                                      |
|----------------------|--------------------------------------------------------|
| IUPAC name           | <i>R,S</i> -2-(4-(2-methylpropyl)phenyl)propanoic acid |
| Molecular formula    | C <sub>13</sub> H <sub>18</sub> O <sub>2</sub>         |
| Molecular weight     | 206.29 g/mol                                           |
| pK <sub>a</sub>      | 4.1–4.5                                                |
| logP (octanol-water) | 3.97                                                   |
| Melting point        | 75–78 °C                                               |
| Aqueous solubility   | Low (21 mg/L at 25 °C)                                 |

## References

- 1 J. Liang, C. Li, S. Zhang, B. A. Mohamed, L. Wang, J. Xiang, S. Hu, Y. Wang and X. Hu, *Fuel Process. Technol.*, 2023, **252**, 107986.
- 2 J. Liang, C. Li, S. Zhang, S. Wang and X. Hu, *Ind. Crops Prod.*, 2024, **221**, 119387.
- 3 B. Li, C. Li, D. Li, L. Zhang, S. Zhang, Z. Cui, D. Wang, Y. Tang and X. Hu, *Fuel Process. Technol.*, 2023, **252**, 107987.
